# Supplementary material for: Copper nanoparticles on hydrotalcite as a heterogeneous catalyst for oxidant-free dehydrogenation of alcohols
Source: Royal Society of Chemistry journal article supplement (doi:10.1039/b809012b), 2008-01-01
Supplement: b809012b.pdf [file b809012b.pdf]

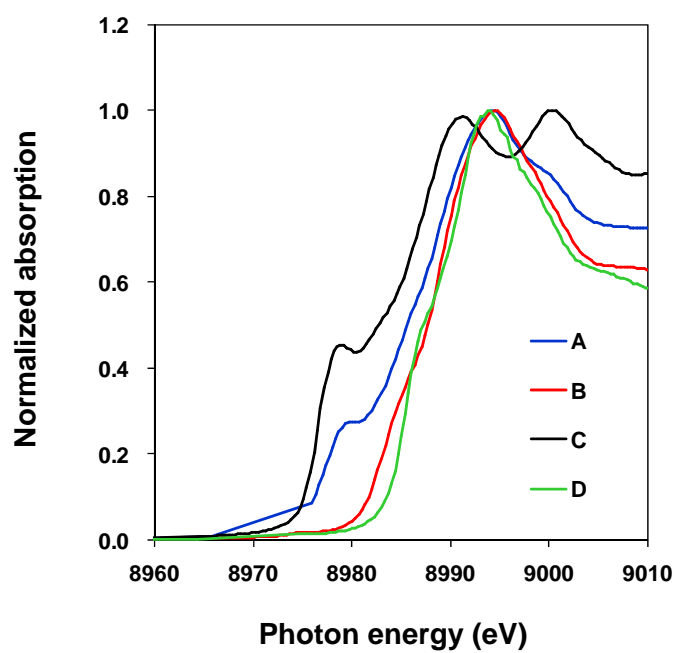

**Figure 1S.** Cu K-edge XANES spectra of (A) Cu/HT, (B) Cu<sup>II</sup>/HT, (C) Cu foil, (D) Cu(CF<sub>3</sub>SO<sub>3</sub>)<sub>2</sub>.

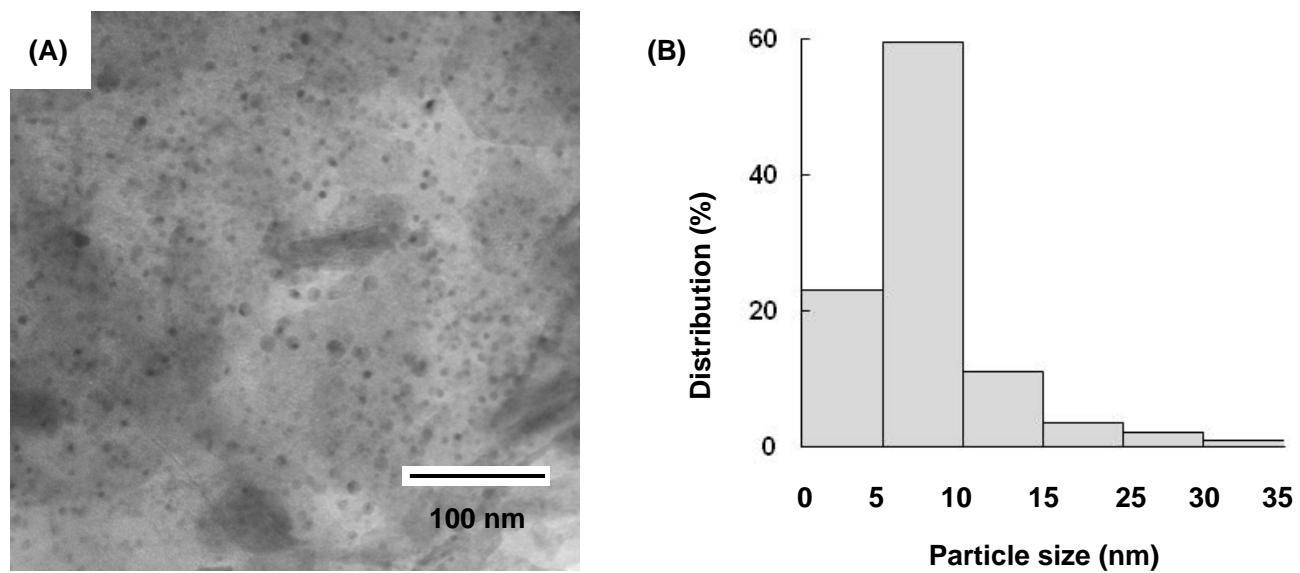

**Figure 2S.** (A) TEM image of Cu/HT, (B) size distribution diagram of the Cu nanoparticles.

**A typical procedure for the dehydrogenation of cyclooctanol by Cu<sup>II</sup>/HT:** Cu<sup>II</sup>/HT (0.10 g, 0.073 mmol Cu) was placed in a Schlenk tube equipped with a reflux condenser. The vessel was evacuated and filled with 1 atm of molecular hydrogen (H<sub>2</sub>) and the solid catalyst was stirred at 180 °C for 0.5 h. After replacing the H<sub>2</sub> with Ar, a mineral oil bubbler was attached to the top of the condenser, *p*-xylene (5 mL) and cyclooctanol (1.0 mmol) were added, and the reaction mixture was vigorously stirred at 130 °C under Ar for 3 h. The solid catalyst was removed by centrifugation and the yield was determined by GC analysis with biphenyl as an internal standard (Shimadzu GC-8A, carrier gas: N<sub>2</sub> (50 kPa), H<sub>2</sub> (50 kPa), and air (50 kPa), column: 5 % KOCL-3000T (5.0 m); oven temperature program: from 100 °C, 16 °C/min up to 220 °C, hold for 10 min, injection and detection temperature: 270 °C, retention time: cyclooctanone (7.7 min), cyclooctanol (8.6 min), biphenyl (11.7 min)).

**Measurement of H<sub>2</sub>:** The dehydrogenation was carried out in a closed vessel under standard reaction conditions. After the reaction, the gas phase was subjected to GC-TCD for qualitative and quantitative analysis of H<sub>2</sub>. GC conditions were as follows: GC using thermal conductivity detector (Shimadzu GC-8A, column: molecular sieves 13X (4.0 m), oven temperature: 40 °C, injection and detection temperature: 70 °C, carrier gas: Ar (100 kPa), current: 60 mA, retention time: H<sub>2</sub> (3.0 min)). Evolution of H<sub>2</sub> was also confirmed volumetrically using a gas buret attached to the reactors.

**Recycling experiments:** another portion of the cyclooctanol (1.0 mmol) was successively added to the reaction mixture after the first and second runs, and the reaction mixture was continuously stirred at 130 °C under Ar for 3 h.

**Product purification:** after the dehydrogenation reaction, CuHT was removed by filtration, and the filtrate was concentrated under reduced pressure. The residue was subjected to silica gel column (Wakogel C-200), and eluted by a mixture of EtOAc and hexane (3:2).

**Product identification:** the products showed spectra in an excellent agreement with the reported data. All products are commercially available. CAS registry number and references are shown below.

Table 1.

cyclooctanone (entry 1);<sup>1,2</sup> CAS registry No. [502-49-8]

2-octanone (entry 2);<sup>3</sup> CAS registry No. [111-13-7]

Table 2.

cyclododecanone (entry 4);<sup>4</sup> CAS registry No. [830-13-7]

cyclopentanone (entry 5);<sup>3</sup> CAS registry No. [120-92-3]

cyclohexanone (entry 6);<sup>3</sup> CAS registry No. [108-94-1]  
3-methylcyclohexanone (entries 7 and 8);<sup>3</sup> CAS registry No. [591-24-2]  
4-ethylcyclohexanone (entries 9 and 10);<sup>5</sup> CAS registry No. [5441-51-0]  
3,5-dimethylcyclohexanone (entries 11 and 12);<sup>6</sup> CAS registry No. [2320-30-1]  
octahydro-1(2H)-naphthalenone (entries 13 and 14);<sup>7</sup> CAS registry No. [4832-16-0]  
4-(1,1-dimethylethyl)cyclohexanone (entries 15 and 16);<sup>8</sup> CAS registry No. [98-53-3]  
2-norbornanone (entries 17 and 18);<sup>9</sup> CAS registry No. [497-38-1]  
2-adamantanone (entries 19);<sup>3</sup> CAS registry No. [700-58-3]  
5 $\alpha$ -cholestan-3-one (entries 20);<sup>10</sup> CAS registry No. [566-88-1]  
acetophenone (entries 22);<sup>3</sup> CAS registry No. [98-86-2]  
2-acetylpyridine (entries 23);<sup>11</sup> CAS registry No. [1122-62-9]  
benzaldehyde (entries 24 and 25);<sup>12</sup> CAS registry No. [100-52-7]  
octanal (entries 26);<sup>12</sup> CAS registry No. [124-13-0]  
benzyl benzoate;<sup>13</sup> CAS registry No. [120-51-4]  
2-cyclopentylcyclopentanone;<sup>14</sup> CAS registry No. [14112-41-5]

## References

- (1) F. J. Weigert, J. D. Roberts, *J. Am. Chem. Soc.*, 1970, **92**, 1347.
- (2) H. Tanaka, J. Kubota, S. Miyahara, M. Kuroboshi, *Bull. Chem. Soc. Jpn.*, 2005, **78**, 1677.
- (3) J. M. Grill, J. W. Ogle, S. A. Miller, *J. Org. Chem.*, 2006, **71**, 9291.
- (4) M. H. Ali, S. Greene, C. J. Wiggin, S. Khan, *Synth. Commun.*, 2006, **36**, 1761.
- (5) Y. Naruse, H. Yamamoto, *Tetrahedron*, 1988, **44**, 6021.
- (6) S. Chow, M. T. Fletcher, L. K. Lambert, O. P. Gallagher, C. J. Moore, B. W. Cribb, P. G. Allsopp, W. Kitching, *J. Org. Chem.*, 2005, **70**, 1808.
- (7) A. Fuerstner, R. Csuk, C. Rohrer, H. Weidmann, *J. Chem. Soc., Perkin Trans. 1.*, 1988, **7**, 1729.
- (8) H. Tanaka, J. Chou, M. Mine, M. Kuroboshi, *Bull. Chem. Soc. Jpn.*, 2004, **77**, 1745.
- (9) E. Plettner, A. Mohle, M. T. Mwangi, J. Griscti, B. O. Patrick, R. Nair, R. J. Batchelora, F. Einstein, *Tetrahedron: Asymmetry*, 2005, **16**, 2754.
- (10) J. Römer, D. Scheller, G. Grossmann, *Magn. Reson. Chem.*, 1987, **25**, 135.
- (11) V. Mamane, E. Aubert, Y. Fort, *J. Org. Chem.*, 2007, **72**, 7294.

(12) N. Jiang, A. J. Ragauskas, *Org. Lett.*, 2005, **7**, 3689.

(13) M. R. Crimmin, A. G. M. Barrett, M. S. Hill, P. A. Procopiou, *Org. Lett.*, 2007, **9**, 331.

(14) SDBSWeb: <http://riodb01.ibase.aist.go.jp/sdbs/> (National Institute of Advanced Industrial Science and Technology, 2008.7.2) SDBS No. 6791
